# Supplementary material for: The Sec14-like phosphatidylinositol transfer proteins Sec14l3/SEC14L2 act as GTPase proteins to mediate Wnt/Ca2+ signaling
Source: eLife. 2017 May 2;6:e26362. doi: 10.7554/eLife.26362 (PMC5423769; doi:10.7554/eLife.26362)
Supplement: Figure 1—source data 1. — DOI: http://dx.doi.org/10.7554/eLife.26362.003 [file elife-26362-fig1-data1.xlsx]

## Sheet: Figure 1E
Phosphorylation level of Jnk in Msec14l3 mutant embryos
Experiment	WT-Shield	M-Shield	WT-75%
1	1	0.92	0.76
2	1	0.73	0.98
3	1	1.26	1.12
Averge	1	0.97	0.953333
SD	0	0.268514	0.181475
p-Value		0.864428	0.699601
For this panel, p-Jnk/Jnk level values were plotted
Graphs were made using Prism7 software

## Sheet: Figure1-figure supplement 1D
Body length (um)	WT	Msec14l3
48 hpf	980.40±22.13	859.34±19.34
72 hpf	1139.37±10.25	1009.34±40.08
Body length of embryos were plotted
Graphs were made using Prism7 software

## Sheet: Figure1-figure supplement 2B
	std-MO	L3 MO	Msec14l3			std-MO	L3 MO	Msec14l3
DC-EVL distance/A-V axis	0.0562168	0.0779132	0.0526718		Epiboly ratio	0.858103	0.731823	0.542366
	0.0452456	0.0653737	0.0995043			0.805831	0.772219	0.546778
	0.0632942	0.0460048	0.0675214			0.847695	0.668765	0.49284
	0.0660567	0.0749969	0.056794			0.834888	0.671763	0.566665
	0.0588514	0.0928634	0.109445			0.859703	0.562878	0.658663
	0.0538012	0.0378375	0.0351506			0.883357	0.576129	0.595617
	0.0358922	0.0722109	0.0456967			0.817346	0.58239	0.585711
	0.0353847	0.101611	0.0510726			0.879056	0.689233	0.517014
		0.0540807	0.0356989				0.699716	0.48437
p-value		0.0521835	0.34252		p-value		2.60126e-05	6.60192e-09
Graphs were made using Prism7 software
