# Supplementary material for: The Sec14-like phosphatidylinositol transfer proteins Sec14l3/SEC14L2 act as GTPase proteins to mediate Wnt/Ca2+ signaling
Source: eLife. 2017 May 2;6:e26362. doi: 10.7554/eLife.26362 (PMC5423769; doi:10.7554/eLife.26362)
Supplement: Figure 2—source data 1. — DOI: http://dx.doi.org/10.7554/eLife.26362.008 [file elife-26362-fig2-data1.xlsx]

## Sheet: Figure 2I
Relative protein level of mDvl2-Flag
	No Wnt5a		Wnt5a-5'
Experiment	NC-shRNA	hL2-shRNA	NC-shRNA	hL2-shRNA
1	1	0.179824	4.08248	0.377816
2	1	0.304764	4.50653	0.2224
3	1	0.250702	3.9875	0.3152
average	1	0.245097	4.19217	0.305139
SD	0	0.0626585	0.276354	0.0781951
p-value		0.00228857	0.00248894
				0.000830726
				0.360533
Graphs were made using Prism7 software
