# Supplementary material for: The Sec14-like phosphatidylinositol transfer proteins Sec14l3/SEC14L2 act as GTPase proteins to mediate Wnt/Ca2+ signaling
Source: eLife. 2017 May 2;6:e26362. doi: 10.7554/eLife.26362 (PMC5423769; doi:10.7554/eLife.26362)
Supplement: Figure 3—source data 1. — DOI: http://dx.doi.org/10.7554/eLife.26362.012 [file elife-26362-fig3-data1.xlsx]

## Sheet: Fig.3A
Relative protein level of PLCδ1-PH-GFP
Experiment	NC-shRNA	hL2-shRNA
1	1	2
2	1	1.8
3	1	2.5
average	1	2.1
p-value		0.0339969

## Sheet: Fig.3B
No. of cell	Intensity of (PM-Cytosol)/ Cytosol
	PLCδ1-PH-GFP		PIP2
1	NC-shRNA	hL2-shRNA	NC-shRNA	hL2-shRNA
2	0.664277	0.883012	0.57	2.625
3	0.660839	0.821429	0.87	2.345
4	0.831588	1.42946	0.75	3.561
5	1.25295	2.51594	1.53	5.642
6	1.66149	1.16435	1.26	1.56
7	1.51171	1.61307	1.25	1.85
8	1.14341	1.44601	0.25	1.5546
9	0.774572	1.25742	0.29	5.894
10	0.993127	1.85953	0.58	2.846
11	1.07278	1.5614	1.79	2.576
12	1.16874	0.688828	1.65	2.315
13	0.626495	5.78883	1.52	2.159
14	0.208621	1.53305	2.1	4.564
15	1.39691	1.45659	1.5	1.058
16	0.873927	1.58678	1.3	1.0068
17	1.8394	2.20492	0.3	4.253
18	0.45286	0.421212	0.54	5.1
19	2.19154	0.923987	0.18	2.654
20	2.34279	1.47893	0.65	1.876
21	1.44718	1.85768	0.78	1.259
22	0.686644	3.19986	0.98	1.264
23	1.75606	3.20418	0.89	2.486
24	0.70563	4.37787	0.86	2.653
25	1.16716	0.805522	1.12	2.157
26	0.954848	1.21068	1.35	2.492
27	1.22449	2.82627	1.2	1.594
28	2.20019	1.02767	1.47	1.238
29	0.899567	1.31696	0.95	4.59
30	1.89681	2.21095	0.862	3.049
31	0.800744	0.683307	0.843	2.319
32	1.01408	1.23049	0.657	2.0089
33	0.642765	1.31967	0.549	2.156
34	1.47362	1.60555	0.7652	2.497
35	1.64738	2.9212	1.265	0.984
36	0.668055	1.27783	1.112	0.854
37	0.283353	1.5242	1.345	0.657
38	1.91095	2.23697	1.641	0.946
39	0.85584	1.94118	1.853	2.864
40	0.592045	3.82524	1.278	2.5614
41	1.35302	2.41023	0.854	2.358
42	0.77707	1.32101	0.659	2.164
43	1.37906	1.94667	0.648	2.594
44	1.38665	1.9841	1.056	2.33156
45	0.424223	1.31487	1.312	2.984
46	0.626495	4.98236	1.046	2.684
47	1.0961	1.75433	0.886	2.95721
48	0.933967	2.85991	0.956	3.194
49	1.68182	2.47298	0.756	3.2257
50	0.357518	1.61111	0.846	0.589
51	0.785235	1.50896
52	0.731468
	2.12201
average	1.11827	1.90809	1.01366	2.47245
p-value		1.54848e-05		6.67086e-11

## Sheet: Fig.3F
No. of Embryos	PLCδ1-PH-GFP intensity of (PM-Cytosol)/ Cytosol					No. of embryos	PLCδ1-PH-GFP intensity of (PM-Cytosol)/ Cytosol					No. of embryos	PLCδ1-PH-GFP intensity of (PM-Cytosol)/ Cytosol
	WT-4 hpf	Msec14l3-4 hpf	WT-6 hpf	Msec14l3-6 hpf			WT-6 hpf		Msec14l3-6 hpf				std MO-6 hpf		Wnt5b-MO1-6 hpf
1	1.01685	2.38721	1.07681	1.52221			No Wnt5b	Wnt5b	No Wnt5b	Wnt5b			No Sec14l3	Sec14l3	No Sec14l3	Sec14l3
2	1.02808	1.41581	1.66671	1.47837		1	0.9876	0.254	2.564	0.254		1	1.2547	0.3348	1.8606	0.5478
3	0.704509	2.43445	1.09438	1.81743		2	1.356	0.126	2.89	2.0568		2	1.2964	0.2105	1.4852	0.4651
4	2.39991	1.94003	0.794392	2.23042		3	1.2156	0.4689	2.965	2.341		3	0.3874	0.5579	1.2697	0.7768
5	2.02511	1.41523	1.34961	1.74969		4	0.5678	0.375	3.654	2.215		4	1.3328	0.4085	0.7564	0.5894
6	1.3423	1.96436	1.69095	1.56961		5	0.98467	1.248	3.548	2.165		5	1.5946	1.0034	2.1108	0.7441
7	0.747745	1.4702	1.08113	1.74321		6	0.5264	1.332	3.267	2.048		6	0.7861	0.7495	2.2674	1.0257
8	1.57902	1.10014	0.712957	1.21265		7	1.289	0.149	1.25	2.345		7	0.6648	0.6724	2.3486	0.5318
9	1.48131	1.47347	1.64776	1.46193		8	1.785	0.24369	1.364	3.15		8	1.0248	0.6981	1.1755	0.7428
10	0.827711	2.21217	1.28022	1.58019		9	2.546	0.3348	1.2597	3.017		9	1.321	0.7429	1.847	0.3487
11	0.446018	2.41237	1.8478	1.58737		10	2.104	0.2879	1.648	2.016		10	0.9456	0.8102	1.7648	0.9467
12	0.683916	3.57057	0.325477	2.01462		11	2.542	0.546	0.984	1.254		11	1.1137	1.2248	1.5561	0.5527
13	0.932325	1.64231	0.945863	2.65786		12	0.264	0.667	2.68	1.364		12	0.7648	1.0385	1.2645	0.3791
14	1.33062	1.65736	0.690654	1.8041		13	0.8864	0.532	2.789	1.387		13	0.5543	0.0486	0.9946	0.5067
15	0.828123	2.12096	0.900918	2.27276		14	0.9861	0.259	2.4583	1.60325		14	0.4495	0.1546	1.7648	0.4815
16	1.35162	2.11028	0.583462	1.34432		15	1.452	0.224	2.331	2.119		15	1.0484	0.5217	1.8894	0.7649
17	1.2242	1.10363	0.953988	1.67532		16	1.2465	0.2151	0.964	2.0135		16	1.0027	0.4128	1.9107	0.4337
18	0.377235	2.08372	1.76287	1.4607		17	1.375	0.1364	3.647	2.0546		17	0.9553	0.4497	1.8691	0.843
19	1.01049	1.96662	1.0921	1.83477		18	1.459	0.164	3.109	2.0891		18	0.9814	0.6483	0.6758	0.8874
20	0.933668	1.44734	2.03962	1.98021		19	1.854	0.0532	2.158	2.987		19	0.9556	0.5498	1.9943	0.8604
21	1.23336	1.81354	1.02983	1.6947		20	1.264	0.1425	2.224	2.951		20	1.3586	0.4761	1.6482	0.5579
22	0.98996	1.78385	1.49782	1.80193		21	1.028	0.2003	2.236	2.618		21			1.7325	0.5741
23	1.04404	1.42658	1.05283	1.57366		22		0.1375	2.415	3.219		22			1.7594
24	1.37765	1.81739		1.4621		23			2.378	2.157
25	1.32669	1.92659		2.7863		24			2.058	0.548
26	1.12355	1.08766		1.84103		25			2.186	0.854
27	0.250088	0.964314		2.59		26			2.3154	0.8221
28	1.27042	1.28498		1.4316		27			2.2205	2.461
29	0.632248	4.23872		1.5321		28				2.851
30	2.32101	3.14053		1.702
31	1.59158	3.96822		1.76983
32	2.0057	2.51158		1.211
33	0.473278	3.5242		2.01462
34	1.42845	2.89263		2.65786
35	1.41312	3.63237		1.8041
36	1.29797	2.32015		2.27276
37	1.72188	3.41154		1.52221
38	0.465849	4.14308		1.47837
39	1.5363	2.79123		1.81743
40	0.874685	1.88789
41	1.05755	2.08203
42	2.55548	2.47133
43	1.09476	1.9835
44	0.946884	2.84691
45	0.508802	2.60617
46	0.820344	2.57791
47	0.664953	2.39352
48	0.417005	2.36908
49	1.14387	2.01505
50		1.90119
51		2.40956

## Sheet: Fig3-supple 1C
No. of embryos	PLCδ1-PH-GFP intensity of (PM-Cytosol)/ Cytosol					No. of embryos	AKT1-PH-GFP intensity of (PM-Cytosol)/ Cytosol					No. of embryos	AKT1-PH-GFP intensity of (PM-Cytosol)/ Cytosol
	4 hpf		6 hpf				4 hpf		6 hpf				4 hpf		6 hpf
	std-MO	sec14l3-MO	std-MO	sec14l3-MO			WT	Msec14l3	WT	Msec14l3			std-MO	sec14l3-MO	std-MO	sec14l3-MO
1	1.254	2.546	1.378	1.956		1	1.058	2.156	1.542	1.948		1	0.465	3.154	1.461	2.987
2	1.023	2.368	1.244	1.845		2	1.245	2.245	1.226	1.764		2	1.357	3.059	1.256	2.6849
3	1.058	2.105	0.248	1.756		3	1.115	2.221	1.059	1.554		3	1.265	3.24	1.348	2.465
4	1.987	1.254	0.594	1.554		4	1.754	2.687	1.345	1.587		4	1.059	3.751	1.259	2.864
5	1.336	1.981	0.675	1.678		5	1.654	2.458	1.264	0.948		5	1.145	3.541	1.486	2.224
6	1.005	1.785	0.556	1.568		6	1.108	2.059	1.286	0.964		6	0.864	3.156	1.024	2.619
7	1.476	1.624	0.875	0.754		7	1.019	1.876	1.145	0.886		7	0.778	2.486	1.067	2.048
8	0.534	1.225	1.98	0.524		8	2.587	1.987	1.448	1.348		8	0.876	2.125	0.914	2.684
9	0.614	3.214	1.58	0.664		9	2.496	1.954	1.349	1.546		9	0.548	2.224	0.887	2.378
10	2.103	3.125	1.674	0.594		10	2.154	2.348	1.268	1.476		10	0.586	2.489	0.864	1.54
11	2.046	2.115	1.886	1.246		11	2.994	2.223	1.025	1.974		11	0.789	2.648	0.834	1.332
12	0.357	2.546	1.753	1.029		12	0.549	2.549	1.461	2.187		12	0.948	2.486	0.744	1.059
13	1.442	2.587	1.649	1.886		13	0.566	2.1547	1.068	2.451		13	1.589	1.787	0.765	1.241
14	1.146	2.159	1.374	1.892		14	0.876	1.059	1.264	2.654		14	0.996	1.894	0.834	1.087
15	1.337	1.658	1.524	1.587		15	0.994	1.048	1.223	2.784		15	1.246	1.6489	2.154	1.117
16	1.321	1.203	1.059	2.159		16	0.964	1.046	1.248	2.654		16	1.156	1.884	2.164	1.165
17	1.678	0.997	1.116	2.57		17	1.548	1.115	1.257	0.879		17	1.348	1.605	2.001	1.248
18	1.597	0.786	1.048	3.064		18	1.632	1.048	1.075	0.994		18	0.776	0.984	0.546	2.264
19	0.945	1.468	1.221	0.649		19	1.789	1.068	1.168	0.648		19	1.549	0.946	0.764	2.248
20	0.875	1.562	1.315	1.254		20	1.864	1.764	1.346	1.948		20	1.548	0.786	0.649	2.163
21	0.654	2.223	1.201	1.364		21	1.599	1.458	1.087	1.648		21	1.504	0.7748	0.678	2.076
22	0.889	2.334	1.064	1.294		22	1.664	1.649	0.548	2.115		22	1.136	0.895	1.978	2.048
23	0.916	2.156	0.876	1.264		23	1.225	1.446	0.954	2.076		23	0.784	2.486	1.996	1.846
24	1.225	1.432	0.487	1.287		24	1.336	1.864	0.997	2.167		24	1.6894	2.564	1.812	1.975
25	0.875	1.278	0.559	1.249		25	1.496	1.885	0.787	2.145		25	0.774	2.499	1.834	1.846
26		3.561		1.458		26	1.152	1.689	0.867	2.0048		26	0.864	2.548	1.675	1.761
27		2.994		1.428		27	1.356	1.554	0.884	1.486		27	0.579	2.679	1.776	1.882
28		3.945		1.493		28	1.046	2.187	2.461	1.846		28	0.664	2.544	1.846	1.764
29		3.875		0.675		29	1.005	2.048	2.224	1.948		29		2.156	1.349	1.846
30		2.756		0.684		30	1.0354	2.748	2.532	1.865		30		2.462		1.869
31		2.245		3.156		31	1.147	3.159	2.354	1.786		31				1.486
32		2.126		2.54		32	1.248	3.057	1.786	1.664
33		2.354		2.684		33	1.068	3.334	1.879	1.994
						34	1.153	3.159	1.864
						35	1.249	3.248	1.984
						36		3.446	1.864
						37		3.167	1.886
						38		2.049	1.764
						39		2.157	1.743
						40		2.169

## Sheet: Fig3-supple 1D & 1E
Fig 3-supple 1D
shRNA	p-ERK/ERK	p-AKT/AKT
NC	1	1
SEC14L2	0.46±0.028	0.94±0.09
Fig 3-supple 1E
	WT-shield	Msec14l3-shield	WT-75%
p-ERK/ERK	1	0.56±0.12	0.95±0.13
p-AKT/AKT	1	0.98±0.16	1.18±0.11

## Sheet: Fig3-supple 2E
No. of embryos	PLCδ1-PH-GFP intensity of (PM-Cytosol)/ Cytosol					No. of embryos	PLCδ1-PH-GFP intensity of (PM-Cytosol)/ Cytosol					No. of embryos	PLCδ1-PH-GFP intensity of (PM-Cytosol)/ Cytosol
	WT-6 hpf		Msec14l3-6 hpf				4 hpf		6 hpf				WT-6 hpf		Msec14l3-6 hpf
	No GFP	GFP	No GFP	GFP			std-MO	Wnt5b-MO	std-MO	Wnt5b-MO			No xDvl-DelN	xDvl-DelN	No xDvl-DelN	xDvl-DelN
1	0.86591	0.77951	2.16774	2.33647		1	0.786357	2.3112	0.883475	2.05047		1	0.849941	0.560517	2.68937	1.75789
2	1.3027	0.96634	2.00185	3.21865		2	0.89476	2.20443	0.9319	2.14507		2	0.837164	0.503298	1.79375	2.59076
3	1.0496	0.88467	2.30775	3.00496		3	1.5786	1.46814	1.11875	1.51585		3	1.01993	0.825498	1.70493	1.40466
4	0.55948	1.1051	1.98461	2.01451		4	0.753531	2.42804	1.46614	1.7023		4	0.664954	0.834387	1.86254	1.73899
5	1.11376	1.22304	1.88702	1.05497		5	0.9745	2.62128	0.812419	1.60428		5	1.0577	0.572738	1.76873	1.95045
6	0.34825	1.37642	1.90375	1.18644		6	0.7769	1.99725	0.630894	2.47554		6	1.01382	0.491077	1.77999	2.14774
7	1.73248	0.65486	3.05411	1.92245		7	0.812419	1.47257	1.13052	2.08366		7	1.17325	0.52163	1.39222	1.17901
8	0.99356	0.63475	3.07682	2.25634		8	1.2158	1.48594	0.981268	1.97164		8	1.38324	0.679953	1.40848	1.35149
9	0.91461	0.99156	3.15877	2.12554		9	0.9461	1.34867	0.975807	2.04703		9	1.13881	0.305534	2.41543	1.92328
10	0.74113	0.8687	1.59915	1.99546		10	1.12871	1.28529	1.24375	2.04064		10	0.794389	0.518297	2.09148	1.81696
11	0.73681	0.56632	1.67143	1.66475		11	1.34951	1.36942	1.06824	2.6737		11	1.15145	0.791612	2.41717	1.01066
12	1.2284	1.5244	1.66204	1.85442		12	0.548731	1.53623	1.42208	1.32814		12	0.987858	0.463301	1.58966	1.09436
13	0.89447	1.71045	2.59883	1.75594		13	0.3764	1.26632	1.03444	1.74118		13	1.24352	0.598347	1.63065	0.885114
14	0.83225	0.52377	2.7354	1.03786		14	0.774695	1.1217	1.53236	1.4987		14	0.840407	0.554997	1.57858	2.42828
15	0.764438	1.22475	1.11058	1.80977		15	0.59761	1.60342	1.51254	1.69539		15	0.978681	0.585374	1.73256	1.58521
16		1.11068	1.43441	1.58865		16	0.89467	1.61572	1.38705	1.78899		16	0.785983	0.550251	1.67939	1.13845
17		1.09467	1.05788	1.85966		17	1.64892	1.65762	0.528256	1.46699		17	0.919511	0.565439	1.6805	1.98286
18				2.35534		18	1.02347	2.25522	0.72964	1.29972		18	1.09259	0.464502		1.36519
19				2.57664		19	1.22467	1.3676	0.959972	1.39988		19		0.4876		1.80666
20				2.66877		20	1.62498	1.26845	0.349216	2.22223		20				1.46782
						21	0.753531	1.2591	0.711422	1.78924		21				1.00346
						22		2.10551	1.53235	1.31673		22				1.57593
						23		2.24538		1.23317		23				1.58899
						24		1.2169		1.43434		24				2.75715
						25		1.37875		1.59981
						26		1.64598		1.84744
						27		2.18121		1.66338
						28		2.17639		1.36098
						29		1.51095		1.38889
						30		1.70246		2.18704
						31		1.72897		2.69127
						32		1.74621		1.79576
						33		1.82146
						34		1.96375
