# Supplementary material for: The Sec14-like phosphatidylinositol transfer proteins Sec14l3/SEC14L2 act as GTPase proteins to mediate Wnt/Ca2+ signaling
Source: eLife. 2017 May 2;6:e26362. doi: 10.7554/eLife.26362 (PMC5423769; doi:10.7554/eLife.26362)
Supplement: Figure 4—source data 1. — DOI: http://dx.doi.org/10.7554/eLife.26362.016 [file elife-26362-fig4-data1.xlsx]

## Sheet: Figure 4
Figure 4A
Experiment		FL	Flag	△N	△S	△G	△Gα
1	Relative protein level of PLCδ1-PH-GFP	0.43	1	0.59	0.56	2.18	1.87
2		0.59	1	0.69	0.66	1.88	2.28
3		0.27	1	0.39	0.46	2.48	1.59
	Averge	0.43	1	0.556667	0.56	2.18	1.91333
	p-value	0.0252731		0.0373685	0.0167853	0.0208733	0.0449076
Figure 4C
		NC-shRNA	SEC14L2-shRNA
Experiment		Flag	Flag	FL	△G	△Gα
1	Relative protein level of PLCδ1-PH-GFP	1	2.32	1.26	3.15	2.56
2		1	2.67	1.37	3.8	2.13
3		1	1.98	1.18	2.52	2.72
	Averge	1	2.32333	1.27	3.15667	2.47
	p-value		0.0219153	0.0391804	0.0281242	0.0140592
Figure 4E
Experiment		Empty	△Gα
1	Fold Enrichment	2	0.2
2		3.7	0.5
3		2.8	0.8
	Averge	2.83333	0.5
	p-value		0.0304201
Figure 4F
Experiment		Empty	△G
1	Fold Enrichment	2.6	0.1
2		3	0.5
3		3.5	0.4
	Averge	3.03333	0.333333
	p-value		0.00327445
Graphs were made using Prism7 software

## Sheet: Figure 4-figure supplement 1
Figure 4-figure supplement 1A
Experiment		GFP Mrna	sec14l3-△G-Flag Mrna
1	p-Erk/Erk	1	0.35
2		1	0.28
3		1	0.54
	Averge	1	0.39
	p-value		0.0158303
Experiment		GFP Mrna	sec14l3-△G-Flag Mrna
1	p-Akt/Akt	1	1.05
2		1	1.24
3		1	0.89
	Averge	1	1.06
	p-value		0.613238
Figure 4-figure supplement 1B
Experiment		GFP Mrna	sec14l3-△Gα-Flag Mrna
1	p-Erk/Erk	1	0.53
2		1	0.32
3		1	0.36
	Averge	1	0.403333
	p-value		0.0114419
Experiment		GFP Mrna	sec14l3-△Gα-Flag Mrna
1	p-Akt/Akt	1	1.29
2		1	1.36
3		1	0.75
	Averge	1	1.13333
	p-value		0.560572
Figure 4-figure supplement 1C
Experiment		Empty	GFP
1	Fold Enrichment	1.96	2.08
2		2.37	2.73
3		3.14	2.5
	Averge	2.49	2.43667
	p-value		0.900808
Graphs were made using Prism7 software
