# Supplementary material for: The Sec14-like phosphatidylinositol transfer proteins Sec14l3/SEC14L2 act as GTPase proteins to mediate Wnt/Ca2+ signaling
Source: eLife. 2017 May 2;6:e26362. doi: 10.7554/eLife.26362 (PMC5423769; doi:10.7554/eLife.26362)
Supplement: Figure 5—source data 1. — DOI: http://dx.doi.org/10.7554/eLife.26362.019 [file elife-26362-fig5-data1.xlsx]

## Sheet: Figure 5
Figure 5D
Experiment		1	2	3	4	5
1	Relative protein level of PM PLCδ4a-HA	0.014	1	1.52621	2.96578	0.300547
2		0.029	1	1.55	2.43	0.45
3		0.019	1	1.95	3.423	0.216
	average	0.0206667	1	1.6754	2.93959	0.322182
	p-value			0.0390196	0.0211944	0.0100334
Figure 5E
Experiment		1	2	3	4	5	6
1	Relative protein level of PM PLCδ4a-HA	1	0.464722	1.24789	1.11817	1.14408	0.481333
2		1	0.63	0.98	1.325	1.252	0.37
3		1	0.28	1.36	0.898	1.056	0.59
	average	1	0.458241	1.19596	1.11372	1.15069	0.480444
	p-value		0.0330979	0.224274	0.453672	0.117123	0.0146156
Figure 5F
		mDvl2-Myc + Plcδ4a-HA
		No Wnt5a	Wnt5a
Experiment	Relative protein level of PM PLCδ4a-HA	Flag	Flag	△Gα	△G	△NG
1		0.0110455	1	2.6037	0.22231	0.262309
2		0.02	1	3.21	0.35	0.22
3		0.015	1	2.01	0.24	0.37
	average	0.0153485	1	2.6079	0.27077	0.284103
	p-value			0.0434167	0.00298675	0.00386761
Figure 5G
		ctr liposome		PIP2 liposome
Experiment		NC-shRNA	hL2-shRNA	NC-shRNA	hL2-shRNA
1	Relative protein level of Bound PLCδ4a-HA	0	0	1	0.015339
2		0	0	1	0.0841277
3		0	0	1	0.0366751
	average	0	0	1	0.0453806
	p-value				0.000453187
Graphs were made using Prism7 software

## Sheet: Figure 5-figure supplement 1
Figure 5-figure supplement 1C
Experiment		NC-shRNA	hL2-shRNA
1	Relative protein level of mDvl2-Flag	1	0.89
2		1	0.95
3		1	1.24
	average	1	1.02667
	p-value		0.828106
Figure 5-figure supplement 1D
Experiment		Flag	Flag	△Gα	△G	△NG
1	Relative protein level of PM Plcδ4a-HA	0.14	1	1.26621	3.8976	0.250547
2		0.29	1	1.55	2.49	0.45
3		0.19	1	1.3989	2.564	0.113
	average	0.206667	1	1.40504	2.98387	0.271182
	p-value			0.0386114	0.049256	0.0175449
Graphs were made using Prism7 software
