# Supplementary material for: The Sec14-like phosphatidylinositol transfer proteins Sec14l3/SEC14L2 act as GTPase proteins to mediate Wnt/Ca2+ signaling
Source: eLife. 2017 May 2;6:e26362. doi: 10.7554/eLife.26362 (PMC5423769; doi:10.7554/eLife.26362)
Supplement: Figure 6—source data 1. — DOI: http://dx.doi.org/10.7554/eLife.26362.022 [file elife-26362-fig6-data1.xlsx]

## Sheet: Figure 6
Figure 6G
		hFz5-Myc			mDvl2-Flag			Plcδ4a-HA
Experiment		-	GTPγS	GDP	-	GTPγS	GDP	-	GTPγS	GDP
1	Relative protein level	0	1	1.35	0	1	4.57	0	1	0.56
2		0	1	0.95	0	1	3.9	0	1	0.28
3		0	1	0.87	0	1	5.2	0	1	0.37
	average	0	1	1.05667	0	1	4.55667	0	1	0.403333
	p-value			0.739446			0.010954			0.0185996
Figure 6K
time	L3-△Gα		L3
0	0		0
20	1.914687 ± 0.1143818		8.940852 ± 2.318475
40	3.196617 ± 0.3209002		21.68098 ± 2.542134
60	5.047594 ± 0.7915003		30.07875 ± 2.039161
Figure 6L
		ctr liposome	PIP2 liposome
Experiment		Flag	Flag	△Gα	FL
1	Relative protein level of Bound PLCδ4a-HA	0	1	1.77669	0.578326
2		0	1	2.253	0.3652
3		0	1	1.568	0.652
	average	0	1	1.8659	0.531842
	p-value			0.0506751	0.0321225
Figure 6M
Experiment		FL	△Gα
1	Relative protein level of PLCδ4a-HA	1	0.0152
2		1	0.235
3		1	0.1463
	average	1	0.132167
	p-value		0.00536843
Graphs were made using Prism7 software

## Sheet: Figure 6-supplemental 1
Figure 6-Supplemental 1A
Relative protein level of hFz5-CT-Myc
Experiment	GST	GST-L3-FL	GST-L3-△Gα
1	0	1	0.9587
2	0	1	1.235
3	0	1	0.765
average	0	1	0.986233
p-value			0.9288
Figure 6-Supplemental 1B
Relative protein level of mDvl2-Flag
Experiment	GST	GST-L3-FL	GST-L3-△Gα
1	0	1	0.0587
2	0	1	0.387
3	0	1	0.187
average	0	1	0.2109
p-value			0.0143393
Graphs were made using Prism7 software
