# Supplementary material for: The Sec14-like phosphatidylinositol transfer proteins Sec14l3/SEC14L2 act as GTPase proteins to mediate Wnt/Ca2+ signaling
Source: eLife. 2017 May 2;6:e26362. doi: 10.7554/eLife.26362 (PMC5423769; doi:10.7554/eLife.26362)
Supplement: Supplementary file 1. — DOI: http://dx.doi.org/10.7554/eLife.26362.025 [file elife-26362-supp1.docx]

**Supplementary file 1:**

**Primers used in the present study:**

| Construct name |  | Primer sequences |
| --- | --- | --- |
| pCS2-Flag-Sec14l3-S | F | CCGGAATTCATGCTGACCGATCCTGATGGGG |
| R | CCGCTCGAGCTAGTTGTCTGATTGGTTGAC |
| pCS2-Flag-Sec14l3-G | F | CCGGAATTCATGAGCGGAAGGGTTGGAGATC |
| R | CCGCTCGAGCTAACAGTTTGGTGCGATAAGCTC |
| pCS2-Flag-Sec14l3-Gα | F | CTAGGATTAAAGTGGACTATGAACAGTCTG |
| R | ATAGTCCACTTTAATCCTAGTTCTACATTTGG |
| pCS2-Flag-Sec14l3-NG | F | CCGGAATTCATGATAGAGTTTCGGAAACACATG |
| R | CCGCTCGAGCTAACAGTTTGGTGCGATAAGCTC |
| pCS2-mDvl2-Myc | F | CGGAATTCGCGGGCAGCAGCGCGGGGGG |
| R | CGCGGATCCAAAAAATACTCCCCCAAATAT |
| pCS2-Plcδ4a-N2-HA | F | CCGGAATTCATGACAGAACGACAGATGGCTTC |
| R | CGCGGATCCGCGCTGAGTCAGCATCTTA |
| pCS2-Plcδ4a-N1-HA | F | CCGGAATTCATGACAGAACGACAGATGGCTTC |
| R | CGCGGATCCGAGTTCGAGCATTGCAGGGTTG |
| pCS2-Plcδ4a-C1-HA | F | CCGGAATTCATGTACCAAGACATGTCTCAGCCTC |
| R | CGCGGATCCGGTTAAGTTTGTAATCCGGATATG |
| EZ-T-Sec14l3 | F | ATAGAGACTTATGGAGAGGTTC |
| R | CTGATTGGTTGACTTGACTG |
| pXT7-Plcδ4a-28-HA | F | GCGATGATTTAATCCACCTATCTTCTTTC |
| R | TAGGTGGATTAAATCATCGCAACAACAGC |
| pXT7-PLCδ1a-PH-mCherry | F | CGGAATTCCACCATGGACTCGGGCCGGGAC |
| R | GAAGATCTTTACTTGTACAGCTCGTCC |
| pXT7-GCaMP6 | F | GAAGATCTCACCATGGGTTCTCATCATCATC |
| R | GGACTAGTTCACTTCGCTGTCATCATTTG |
| pXT7-AKT1-PH-mCherry | F | CGGAATTCCACCATGAGCGACGTGGCTATT |
| R | GAAGATCTTTACTTGTACAGCTCGTCC |
| pXT7-Sec14l3-G-flag | F | CCGGAATTCCACCATGAGCGGAAGGGTTGGAGATC |
| R | CCGCTCGAGCTATTTGTCATCGTCGTCCTTGTAGTCCATACAGTTTGGTGCGATAAG |
| pEGFP-N3-Sec14l3-5' UTR | F | CGAATTCTGCAGTCGACGGTAATTTCTGCTGCACTCGTGGC |
| R | CTCCTCGCCCTTGCTCACCAT CTGCCACTCGGTTGTGATGG |
| pGEX-6p-1-6xMyc-hFz5-CT | F | GGAATTCTCGGGCAAGACGGTGGAG |
| R | CCGCTCGAGCTACACGTGCGACAGGGACAC |
| pGEX-6p-1-6xMyc-RFz2-CT | F | GGAATTCTCCGGCAAGACGCTGCAC |
| R | CCGCTCGAGTCACACGGTGGTCTCTCC |
| pCS2-Plcδ1a-HA | F | CCATCGATATGTCTTGTCCATTTAAACCTC |
| R | CCGCTCGAGAGCATCTAGAAGCATAACGTG |
| pCS2-Plcδ3b-HA | F | CCATCGATATGTTGAGAAAGAAGAAGACTG |
| R | CCGCTCGAGTTCTCGGGCACTATGTGCGAC |
| pCS2-Plcδ4a-HA | F | CCGGAATTCATGACAGAACGACAGATGGCTTC |
| R | CGCGGATCCGGTTAAGTTTGTAATCCGGATATG |
| pCS2-Flag-Sec14l3-N | F | CCGGAATTCATGATAGAGTTTCGGAAACACATG |
| R | CCGCTCGAGCTAGTTGTCTGATTGGTTGAC |
